# **Perversely expressed long noncoding RNAs can alter host response and viral proliferation in SARS-CoV-2 infection**

Rafeed Rahman Turjya<sup>1</sup>, Md. Abdullah-Al-Kamran Khan<sup>2</sup>, Abul Bashar Mir  
Md. Khademul Islam<sup>1\*</sup>

<sup>1</sup>Department of Genetic Engineering & Biotechnology, University of Dhaka, Dhaka, Bangladesh.

<sup>2</sup>Department of Mathematics and Natural Sciences, BRAC University, Dhaka, Bangladesh.

**\* Correspondence:**

**Dr. Abul Bashar Mir Md. Khademul Islam**

Associate Professor

Department of Genetic Engineering and Biotechnology

University of Dhaka

Dhaka 1000, Bangladesh.

Email: khademul@du.ac.bd

## 28 Abstract

29 **Background:** Since December 2019, the world is experiencing an unprecedented crisis due  
30 to a novel coronavirus, SARS-CoV-2. Owing to poor understanding of pathogenicity, the  
31 virus is eluding treatment and complicating recovery. Regulatory roles of long non-coding  
32 RNAs (lncRNAs) during viral infection and associated antagonism of host antiviral immune  
33 responses has become more evident in last decade. To elucidate possible functions of  
34 lncRNAs in the COVID-19 pathobiology, we have utilized RNA-seq dataset of SARS-CoV-2  
35 infected lung epithelial cells.

36 **Results:** Our analyses uncover 21 differentially expressed lncRNAs whose functions are  
37 broadly involved in cell survival and regulation of gene expression. By network enrichment  
38 analysis we find that these lncRNAs can directly interact with differentially expressed  
39 protein-coding genes *ADAR*, *EDN1*, *KYNU*, *MALL*, *TLR2* and *YWHAG*; and also *AKAP8L*,  
40 *EXOSC5*, *GDF15*, *HECTD1*, *LARP4B*, *LARP7*, *MIPOL1*, *UPF1*, *MOV10* and *PRKAR2A*,  
41 host genes that interact with SARS-CoV-2 proteins. These genes are involved in cellular  
42 signaling, metabolism, immune response and RNA homeostasis. Since lncRNAs have been  
43 known to sponge microRNAs and protect expression of upregulated genes, we also identified  
44 9 microRNAs that are induced in viral infections; however, some lncRNAs are able to block  
45 their usual suppressive effect on overexpressed genes and consequently contribute to host  
46 defense and cell survival.

47 **Conclusions:** Our investigation determines that deregulated lncRNAs in SARS-CoV-2  
48 infection are involved in viral proliferation, cellular survival, and immune response,  
49 ultimately determining disease outcome and this information could drive the search for novel  
50 RNA therapeutics as a treatment option.

51

52

53

54

## 55 Keywords

56 COVID-19, SARS-CoV-2, lncRNA, miRNA, Long noncoding RNA, viral pathogenesis

## 57    **Background**

58    By mid-May 2020, the confirmed cases of COVID-19 have crossed 4 million (1), making it  
 59    one of the largest pandemics in modern times. Since the first reported case at Wuhan, China  
 60    in December 2019 (2), this viral disease has been responsible for more than 300,000 deaths  
 61    worldwide (1), and the number is steadily rising. The causative agent behind the disease is a  
 62    novel beta-coronavirus (3), which has been named SARS Coronavirus 2 i.e. SARS-CoV-2  
 63    due to its similarity to the earlier SARS-CoV first detected in 2002 (4). The rapid spread of  
 64    the virus, the ever-increasing death toll, and absence of a sufficient treatment strategy has  
 65    affected societies and economies all over the globe.

66    The molecular mechanism of SARS-CoV-2 is complex and interrelated with host  
 67    mechanisms, as is common with most pathogenic viruses (5). It is possible that infected lung  
 68    epithelial cells trigger innate immune pathways, leading to immune effector cells releasing  
 69    high levels chemokines and proinflammatory cytokines and resultant unconfined or  
 70    uncontrolled systemic inflammatory response leads to fatality (6, 7). Recent studies also  
 71    indicate the virus may cause viral sepsis (8) and infection can lead to deregulation in blood  
 72    coagulation (9, 10). But no one conjecture has been able to formulate a clear and concise  
 73    explanation of how the virus spreads so effectively and affects so profoundly. With  
 74    emergence of more and more data, new dimensions arise as possible modes of pathogenesis  
 75    and progression of infection.

76    Non-coding RNAs (ncRNAs), RNAs that do not code for any proteins, are key players in the  
 77    regulation of gene expression and influence the interplay involved in host defense  
 78    mechanisms (11). Regulatory ncRNAs, such as microRNAs (miRNAs) and long non-coding  
 79    RNAs (lncRNAs) act as important regulators of the cellular antiviral response. Consequently,  
 80    viruses have been found to utilize cellular ncRNA to evade immune response and exploit  
 81    cellular machinery to their advantage (12).

82    LncRNAs are a type of non-coding RNA having a size of more than 200 nts that can function  
 83    as primary or spliced transcripts (13). LncRNAs have become increasingly crucial in  
 84    explaining cellular processes and understanding molecular progression of diseases. They may  
 85    regulate gene expression through epigenetic modification of chromatin structure,  
 86    transcriptional control, regulation of gene transcription via direct binding or transcription  
 87    factor recruitment and post-transcriptional processing through protein-RNA interaction (14-

16). Additionally, lncRNAs may function as competing endogenous RNAs (17) to function as regulators of microRNA targeting of genes involved in important pathways.

Previous studies have found lncRNAs to be involved in viral infection and subsequent host response (18-20). A wide selection of lncRNAs get aberrantly modulated in many viral infections like- HSV, Influenza, HIV, HSV etc (21). Upon viral infections, dysregulation of cellular lncRNAs occur which in turn abnormally regulates several host processes resulting in the progression of the viral infection (20). Apart from the general host routes, abnormalities in the expression of lncRNAs mainly affect host's different antiviral innate immune responses, particularly interferon signaling and IFN-stimulated genes (ISGs) (20, 21). Even in SARS-CoV infection, Peng et al. showed that differential expression of lncRNAs could aberrantly regulate several host responses along with the innate immune signaling (22), which suggests a similar deregulation pattern of lncRNAs could also occur in SARS-CoV-2 infection.

Blanco-Melo et al. (23) investigated the host response to SARS-CoV-2 by infecting primary human lung epithelium (NHBE) cells and A549 alveolar cell lines with the virus and performing RNA-seq analysis to identify differentially expressed (DE) genes. But no such study yet concluded the possible outcomes of the deregulated lncRNAs in SARS-CoV-2. In our present study we have identified lncRNAs that are differentially expressed in SARS-CoV-2 infected cell's transcriptome compared to uninfected cells, and then correlated the putative effects of the deregulated lncRNAs in the tug-of-war between SARS-CoV-2 and the host. We have also investigated the possible aftermaths of lncRNA deregulation in COVID-19 disease pathobiology.

## **Results**

### **lncRNAs differentially modulated in SARS-CoV-2 infection**

To investigate the probable deregulation of lncRNAs in SARS-CoV-2 infection, firstly we have analyzed the 24 hours post-infection transcriptome data of SARS-CoV-2 infected NHBE cells. Analyzing the RNA-seq data led to identification of 687 DE genes and intriguingly, amongst those DE genes, we discovered 21 lncRNA genes, 9 of them upregulated while 12 were downregulated (Figure 1).

## **lncRNAs interact with several differentially modulated proteins in SARS-CoV-2 infected cells**

We now sought to elucidate the putative effects of these deregulated lncRNAs in SARS-CoV-2 infection. In order to achieve that, we built a network of the deregulated lncRNAs along with their interacting protein coding target genes. Among the differentially expressed protein-coding genes, 6 were found to interact with the DE lncRNAs which (Table 1). There are direct RNA-RNA interactions for 4 genes, and RNA-protein interactions for the rest (Figure 2). These lncRNA interacting protein coding genes have potential roles during the viral infections (Table 1).

Upregulated *ADAR* interacts directly with downregulated *KCNQ1OT1* and *GAS6-AS1*, and upregulated *MEG3* and *INHBA-AS1* (Figure 2). *ADAR* also interacts with *UPF1* and *MOV10* - two proteins which were also interactors of other DE lncRNAs. *EDN1* is found to be upregulated in SARS-CoV-2 infection, which interacts directly with downregulated *UGDH-AS1* (Figure 2). *EDN1* can also interact with *PRKAR2A*, a protein that interacted with *KCNQ1OT1*. *KYNU* mRNA interacts directly with *FAM230J*, which was downregulated (24). *MALL* gene was found upregulated in SARS-CoV-2 infection. This mRNA interacts directly with *AC006058.1*, which was also upregulated. Upregulated *TLR2* interacts directly with downregulated lncRNA *KCNQ1OT1* (Figure 2). *YWHAG* protein interacts directly with *KCNQ1OT1*, *SNHG8*, *GAS6-AS1*, all of which were downregulated (Figure 2).

## **Protein interactors of SARS-CoV-2 viral proteins also interacted with DE lncRNAs**

Gordon et al. investigated possible protein-protein interactions (PPI) between SARS-CoV-2 proteins and host proteins and identified 332 high-confidence interactions (25). We wanted to stratify whether these interacting proteins can be also interact with the DE lncRNAs in SARS-CoV-2 infection. We have constructed a network with the DE lncRNAs and their interacting host proteins that also bind with viral proteins. Among these 332 proteins, we found 10 such proteins to interact with the DE lncRNAs (Table 2). Among them, 7 proteins interacted at protein-RNA level, whereas the rest were RNA-RNA interactions. SARS-CoV-2 proteins M (Membrane), N (Nucleocapsid), Nsp8, Nsp12, Nsp13, and ORF8 were found to interact with these host proteins (Figure 3).

*AKAP8L*, an M protein interactor, protein interacts directly with downregulated *KCNQ1OT1*, *GAS6-AS1*, *SNHG8*, *AC048341.2* and upregulated *ALI09615.3* (Figure 3). Among N protein

interactors, UPF1 and MOV10 proteins interacted directly with DE lncRNAs, and interacted with each other (Figure 3). UPF1 protein interacts with downregulated *AC048341.2*, *LINC00937*, *GAS6-AS1*, *KCNQ1OT1*, *UGDH-AS1*, *SNHG8*, and *AC087473.1* and upregulated *AL109615.3*, *INHBA-AS1*, *MEG3*, *LINC02015*, *MIR3142HG*, *AC006058.1* and *CIRL-AS1* (Figure 3). MOV10 protein interacts with *LINC00504*, *AC048341.2*, *LINC00937*, *GAS6-AS1*, *KCNQ1OT1*, *UGDH-AS1*, *SNHG8* and *AC087473.1*, which were downregulated, and *AL109615.3*, *INHBA-AS1*, *MEG3*, and *LINC02015*, which were upregulated (Figure 3). Both UPF1 and MOV10 proteins also interact with ADAR protein which can interact with *KCNQ1OT1*, *GAS6-AS1*, *MEG3*, and *INHBA-AS1* (Figure 3). *MEG3* can stimulate expression of *GDF15* by enhancing p53 binding to the *GDF15* gene promoter, while *GDF15* can be targeted by viral orf8 (Figure 3).

Among Nsp8 interactors, EXOSC5 and LARP7 proteins interact with *KCNQ1OT1*, and *SNHG8*, both downregulated (Figure 3); *HECTD1* mRNA interacts directly with *KCNQ1OT1* (Figure 3). LARP7 also interacts with LARP4B protein, which interacts with viral Nsp12 and host lncRNA *SNHG8*, and *UGDH-AS1* (Figure 3). Among Nsp12 protein interactors, LARP4B protein interacts with *UGDH-AS1* and *SNHG8*, both downregulated (Figure 3). It also interacts with LARP7, which interacts with viral Nsp8 and host *SNHG8*, and *KCNQ1OT1* (Figure 3). Among Nsp13 interactors, *MIPOL1* and *PRKAR2A* both have RNA-RNA interaction with *KCNQ1OT1*, which is downregulated. *PRKAR2A* also interacts with EDN1, which interacts with *UGDH-AS1* (Figure 3).

### **Upregulated targets of virally-induced microRNAs might be protected by competing lncRNAs**

Competing endogenous RNA (ceRNA) hypothesis illustrates that lncRNAs and other RNA molecules harboring microRNA (miRNA) response elements can suppress the expression and biological function of each other by competing for miRNAs that can bind to the complementary regions, thus regulating miRNA-mediated gene silencing of the target genes (17, 26). Growing evidence indicates that the ceRNA regulation mechanism plays a role in disease progression and drug efficiency (27-30).

To reveal if such networks exists in SARS-CoV-2 infected cells, a list of miRNAs induced in viral infection was curated from miRwayDB database (31), Girardi et al. (32), and Leon-Icaza et al. (33). Among them, few were found to target upregulated genes, which were apparently not targeted, as DE lncRNAs were targeted simultaneously (Figure 4). The names

and functions of all target genes of the selected miRNAs are provided in supplementary file 3.

In SARS-CoV-2 infection, miRNA let-7c might target 21 upregulated gene and can also target *MEG3*, *KCNQ1OT1*, *SNHG8* and *FAM106A* lncRNAs (Figure 4). The 21 upregulated targets of let-7c-5p are significantly enriched for KEGG pathways like- Kaposi's sarcoma-associated herpesvirus infection, and JAK-STAT signaling pathway (data not shown). Among the target genes, PTGES2 protein was found to interact with SARS-CoV-2 Nsp7 protein (Figure 4).

miRNA let-7f can target 20 of the upregulated genes in SARS-CoV-2 infection, including *SOCS3*. It might also target lncRNAs *AC006058.1*, *AC007743.1*, *AC048341.2*, *C1RL-AS1*, *FAM106A*, *INHBA-AS1*, *KCNQ1OT1*, *MEG3* and *SNHG8* (Figure 4). The 20 upregulated targets of the let-7f-5p are involved in pathways like- Kaposi's sarcoma-associated herpesvirus infection related, JAK-STAT signaling and Hepatitis B related signaling (data not shown).

miR-185-5p targets 17 upregulated genes, but also targets lncRNAs *AC006058.1*, *AC008760.2*, *C1RL-AS1*, *FAM106A*, *INHBA-AS1*, *KCNQ1OT1* and *MEG3* (Figure 4). Among the 17 upregulated targets of the miR-185-5p miRNA, most significantly enriched KEGG pathways were MAPK signaling pathway and Wnt signaling pathway (data not shown). miR-197-5p, miR-200c-5p, miR-222 and miR-223-5p target 5, 3, 6 and 6 upregulated genes, respectively. They all can target lncRNA *MEG3* while miR-222 can additionally target *KCNQ1OT1* (Figure 4). The 6 upregulated targets of the miR-185-5p are involved in phagosome, and PI3K-Akt signaling pathway (data not shown). miR-491-3p targets upregulated *NAMPT* gene, but also targets *MEG3* lncRNA (Figure 4). miR-574-5p targets 10 upregulated genes, but also targets lncRNAs *MEG3*, *KCNQ1OT1* and *GAS6-AS1* (Figure 4). These 10 upregulated targets of the miR-574-5p are found significantly enriched in biological process/pathways like-TGF-beta signaling pathway, IL-17 signaling pathway, and apoptotic process (data not shown).

### **Involvement of lncRNA may modulate important cellular pathways**

Cell survival can be beneficial for continued viral replication and growth, but apoptosis is also necessary for spread. Pathways related to cell survival are targeted by virally-induced microRNAs. IL-6/JAK/STAT3 signalling acts in favor of cell survival(34). Upregulation of



IL-6 during certain viral infections may promote virus survival and/or exacerbation of clinical disease (35). Among let-7c-5p targets and let-7f-5p targets, four upregulated genes, *IL6*, *MYC*, *PDGFB* and *STAT2* belong to JAK-STAT signaling pathway. *KCNQ1OT1* can act as a sponge for *MYC* gene, a target of miR-185-5p along with these miRNAs (36) (Figure 4). Also, both let-7c and let-7f target *IL6*, and absence of this interaction may lead to cell transformation progressing from initial inflammation, implying cell survival (37).

Wnt signaling pathway is known to regulate apoptosis through a variety of mechanisms (38) and it can respond to viral infections through modulation of  $\beta$ -catenin stabilization(39). *MYC*, *CSNK1E*, and *FOSL1* belong to Wnt signaling pathway and are targeted by miR-185-5p. *FOSL1* is also targeted by miR-574-5p (Figure 4).

Activation of PI3K-Akt signaling is a known viral strategy to delay apoptosis and prolong viral replication, as seen in acute and persistent infection (40). Three upregulated genes, *EFNA1*, *MYC* and *VEGFA*, targeted by miR-185-5p, and two upregulated genes targeted by miR-222-5p, *ITGA5* and *TGFA*, belong to PI3K-Akt signaling pathway (Figure 4). Also, miR-185 was found to inhibit cell proliferation and induce apoptosis by targeting *VEGFA* directly in von Hippel-Lindau-inactivated clear cell renal cell carcinoma (41).

Cellular response to viral infection can make or break the progression of viral life cycle. Virally-induced microRNAs are also involved in targeting pathways related with inflammation and host defense. NF- $\kappa$ B signaling pathway is involved in upregulating various pro-inflammatory genes that encode cytokines and chemokines (42). It is a major regulator of antiviral response and NF- $\kappa$ B activation pathways are manipulated by viruses to avoid cellular mechanisms that eliminate the infection (43, 44). Two upregulated gene targets of let-7c-5p and let-7f-5p, *CXCL8* and *LYN*, and two upregulated targets of miR-574-5p, *TRAF3* and *TGFBR2* is involved in NF-KappaB signaling pathway (Figure 4). *MEG3* can act as a sponge to promote upregulation of *TRAF3* (45) and *TGFBR2* (46). *BCL3*, a target of miR-197-5p, is involved in regulation of cell proliferation and participates in NF-KappaB signaling pathway (Figure 4).

MAPK pathway positively regulates virus replication in diverse group of viruses (47). 3 upregulated gene targets of let-7c-5p, *MYC*, *PDGFB*, and *DUSP1*, belong to MAPK signaling pathway. *LDLR*, involved with cholesterol homeostasis, is targeted by miR-197-5p and miR-223-5p (Figure 4).



## Discussion

Long noncoding RNAs are regulators and modulators of complex cellular pathways and viral infection is no exception (19, 20). Dysregulation of lncRNA expression and interaction, either directly with viral RNA, or indirectly with host RNA, affect the progression of viral infection (12). LncRNAs can work as a sponge for miRNA, bind protein as a competitive inhibitor, inhibit protein-protein interaction, influence post-translational modification, or affect the activity of target protein. They can modulate viral life cycle, regulate innate immune response, or assist adaptive immunity (18, 48). In our exploration of the deregulated lncRNA in SARS-CoV-2 infected NHBE cells, all of these functionalities come to fore. In our study, lncRNA-interacting DE protein-coding genes and SARS-CoV-2 protein interactors were involved in various pathways. Both RNA-RNA and RNA-protein interactions were present, indicating a complex interplay between the components involved. We also looked for possible lncRNAs exerting effects as competing endogenous RNAs to ensure a particular miRNA does not downregulate a gene. In turn, the upregulated genes play a crucial role in viral replication, disease progression, and immune response. Although some of these miRNAs also target a few downregulated genes, their decrease in expression may be controlled by separate mechanisms. Our findings shed light on the possible role of DE lncRNAs in specific processes involved with viral infection, proliferation and cellular response.

SARS-CoV-2 Nsp7-Nsp8-Nsp12 proteins interact to form a multi-subunit RNA-synthesis complex, where Nsp12 works as the RNA-dependent RNA polymerase. EXOSC5, interactor of Nsp8 protein, is a non-catalytic component of the RNA exosome complex. RNA exosome complex is involved in 3' processing of various stable RNA species and is crucial for RNA quality control in the nucleus (49), thus Nsp8 binding may be fundamental to diminishing the capacity of exosome to act against viral mRNAs. Antiviral drug Remdesivir has been predicted to target and disassemble this complex (50, 51). Interaction of EXOSC5 protein with *KCNQ1OT1* and *SNHG8* can modulate this interaction. The putative RNA-RNA interaction between upregulated *AC006058.1* and *MALL* mRNA, a gene involved in cholesterol homeostasis and membrane trafficking, can exert an influence in maturation of SARS-CoV-2, an enveloped virus. *FAM230J*, which has no reported function, is downregulated in the infected cells. Its absence may activate the upregulated *KYNU*, which is involved in metabolite biosynthesis pathways, through lack of RNA-RNA interaction.

Host RNA-binding proteins that interact with SARS-CoV-2 proteins are involved in regulating viral transcription and mRNA stability. SARS-CoV-2 N protein interacts with UPF1 and MOV10. In case for murine hepatitis virus, a model coronavirus, the N protein carries out this interaction to inhibit nonsense-mediated decay of viral mRNAs containing multiple stop codons, thus favoring viral mRNA transcription. NMD pathways recognized cytoplasmic viral mRNAs as a substrate for degradation, but viral replication induced the inhibition of the NMD pathway through N protein (52). In human T-lymphotropic virus type 1 (HTLV-1)-infected cells, viral protein Tax bound to components of NMD pathways, including UPF1, to inhibit the process (53). SARS-CoV-2 M protein interacts with AKAP8L, which assists in viral infection progression through favoring transcription. Both LARP7 (nsp8 interactor) and LARP4B (nsp12 interactor) are RNA-binding proteins involved in RNA transcription regulation. Interaction of these RNA-binding proteins with the DE lncRNAs may be crucial for viral mRNA transcription and stability against cellular defense.

*ADAR* can be regarded as the “Editor-in-Chief” of innate immunity against viral infection (54), thus the protein’s interaction with both upregulated and downregulated lncRNAs may hold crucial role in SARS-CoV-2 replication cycle. *MEG3* was found to act as a biomarker and regulate cell functions by targeting *ADAR* in colorectal cancer (CRC). The cells overexpressing *MEG3* exhibited increased *ADAR* expression, and downregulation of *MEG3* was found in CRC tissues, cell lines and serum (55). In the infected cells, *MEG3* upregulation may lead to *ADAR* overexpression, which could have been favorable to the virus, as evidenced in Influenza A (56). *INHBA-AS1* upregulation in virus-infected cells may also contribute to cell survival through interaction with *ADAR*, as evidenced in gastric cancer (57) and oral squamous cell carcinoma (58).

Cell survival can be both beneficial to virus and be inhibitory. Viruses need the cell to survive certain period to undergo replication, but they also need apoptosis to exit the cell and infect others. Thus, cell survival and apoptosis becomes a key indicator of pathogenesis. Among lncRNAs, downregulated *SNHG8* has possible link to apoptosis and cell death (59), as does *KCNQ1OT1* (60-63). Unlike both, downregulation of *GAS6-AS1* may be linked with cell proliferation and survival (64, 65). All three interact with YWHAG, which is involved in signal transduction. IL-6/JAK/STAT3 signaling, Wnt signaling pathway, and PI3K-Akt signaling, involved in cell survival, are also protected by probable ceRNA function by lncRNA.

Innate immune response against the infection is inevitable, but the complex interactions underlying its activation and effect may have been the target of lncRNAs. HECTD1 is an E3 ubiquitin-protein ligase that interacts with Nsp8. As it is involved in class I MHC mediated antigen processing and presentation and innate immune system, the binding may lead to modulation of that response. In case of HECTD1 mRNA, absence of RNA-RNA interaction with downregulated *KCNQ1OT1* lncRNA can facilitate the response. PTGES2 gene was upregulated and also found to interact with SARS-CoV-2 Nsp7 protein. As it is involved in innate immune system and signaling pathways, this binding may exert an indirect influence. TLR2, as part of the innate immune response, has been connected to antiviral action against multiple viral infections (66-69). *KCNQ1OT1*, the lncRNA having putative RNA-RNA interaction with TLR2, was found to attenuate sepsis-induced myocardial injury via regulating miR-192-5p/*XIAP* axis. Downregulation of the lncRNA advanced cardiac injury by allowing miR-192-5p to target *XIAP* (70). *XIAP* functions in the inhibition of apoptosis, whereas *TLR2* is known to promote apoptosis. The downregulation of *KCNQ1OT1* in infected cells thus will promote apoptosis, in accordance with its interaction with overexpressed *TLR2* mRNA. Response by NF- $\kappa$ B signaling pathway against the viral infection is probably protected by lncRNA against inhibition by virally-induced miRNAs.

DE lncRNAs also had probable involvement in regulating cellular processes, including signaling. The downregulation of *UGDH-AS1* can be related to *EDN1* overexpression, which can be crucial in vasoconstriction, leading to severe symptoms, as seen in SARS-CoV-2 infections (71). SARS-CoV-2 Nsp13 protein works as a viral helicase, and interacts with MIPOL1 and PRKAR2A. Function of MIPOL1 is unclear, whereas PRKAR2A is involved in cAMP-mediated signaling, which is the probable target for modulation by Nsp13. The RNA-RNA interactions of downregulated *KCNQ1OT1* with the mRNAs of these two genes may have implications on viral infection progression. Additionally, MAPK pathway is probably regulated through lncRNA involvement.

From literature, it was confirmed that *KCNQ1OT1* (72) and *MEG3* (73) both can act as probable ceRNA targets for miR-185-5p, whereas *MEG3* can act as a ceRNA for let-7c-5p (74). This proves the existence of an expanded role of these lncRNAs in infected cells.

## Conclusions

Our findings explore the molecular footprint of SARS-CoV-2 infection from the lens of lncRNAs. The integrated analysis has linked multiple actors in the complex interplay of molecules in exacerbating the infection and identified possible drug targets. We trace the involvement of lncRNAs with cellular behavior in this situation and illuminate their role in cell survival, viral replication, and immune defense. The lethality and swift transmission of this virus is entwined with the deregulated cellular environment, and lncRNA regulation is crucial for understanding its parameters. Our results could provide insights for scheming some novel RNA therapeutics during the lacking of effective cure option.

## Methods

### Identification of differentially expressed lncRNAs

Illumina sequenced RNA-seq raw FastQ reads were extracted from GEO database accession: GSE147507 (75). This data include independent biological triplicates of primary human lung epithelium (NHBE) which were mock treated or infected with SARS-CoV-2 for 24hrs. Mapping of reads was done with TopHat (tophat v2.1.1 with Bowtie v2.4.1) (76). Short reads were uniquely aligned allowing at best two mismatches to the latest version human reference genome from (GRCh38) as downloaded from UCSC database (77). Sequence matched exactly more than one place with equally quality were discarded to avoid bias (78). The reads that were not mapped to the genome were utilized to map against the transcriptome (junctions mapping). Latest version of Ensembl gene model (79) (version 99, as extracted from UCSC) was used for this process. After mapping, we used SubRead package featureCount v2.21 (80) to calculate absolute read abundance (read count, rc) for each transcript/gene associated to the Ensembl genes. For differential expression (DE) analysis we used DESeq2 v1.26.0 with R v3.6.2 (2019-07-05) (81) that uses a model based on the negative binomial distribution. To avoid false positive, we considered only those transcripts where at least 10 reads were annotated in at least one of the samples used in this study.

### Protein-protein interaction (PPI) network construction

From RNA-seq data analysis, identified differentially expressed 638 protein-coding genes and recently reported 332 SARS-CoV-2 protein interactors by Gordon et al. (25) were used in combination to build PPI network. Edge information for the network built with these proteins were extracted from the STRING (82) database. Interactions with high confidence (score

>0.700) were selected and retrieved. A network file was prepared in SIF format to be visualized using Cytoscape v3.7.2 (83).

### **Retrieval of RNA-RNA interactions and lncRNA functions**

RNA-RNA interactions between the DE lncRNAs and other RNAs were retrieved from NPInter v4.0 (84). The interacting RNAs were searched for identified DE protein-coding genes and viral protein-interactor genes. Functions of the DE lncRNAs were retrieved from LncBook (85). The viral proteins that bind to proteins with lncRNA interactors were also identified.

### **Identification of virally-induced miRNAs**

miRwayDB(31) was utilized to look for miRNAs involved in viral-mediated disease. Additionally, host miRNAs involved in viral infection as identified by Girardi et al. (32) and microRNAs in viral acute respiratory infections as described by Leon-Icaza et al. (33) were retrieved. These miRNAs were manually curated for their involvement in viral pathogenesis and possible connection to SARS-CoV-2.

### **Extraction of microRNA targets**

Gene targets for the curated set of miRNAs were retrieved from experimentally validated miRTarBase (86) and filtered for DE protein-coding genes. DIANA-LncBase v3 (87) was used to retrieve miRNAs that target the DE lncRNAs, with high-confidence interactions considered only. The lists were combined to identify the miRNAs that target both DE protein-coding genes and lncRNAs. The set of upregulated target genes for each miRNA were analyzed using NetworkAnalyst 3.0 (88) tools for functional overrepresentation and network enrichment. miRNAs that mostly targeted upregulated genes were finally selected.

### **Construction of biological networks**

Networks denoting the interactions between DE lncRNAs, DE genes, viral proteins, and curated miRNAs were built using Cytoscape v3.7.2 (83).

### **Declarations**

### **Ethics approval and consent to participate**

Not applicable.

## 394 **Consent for publication**

395 Not applicable.

## 396 **Availability of data and materials**

397 Publicly available data were utilized. Analyses generated data are deposited as supplementary  
398 files.

## 399 **Competing interests**

400 The authors declare that they have no competing interests.

## 401 **Funding**

402 This research did not receive any specific grant from funding agencies in the public,  
403 commercial, or not-for-profit sectors.

## 404 **Authors' Contributions**

405 ABMMKI conceived the project. ABMMKI and RRT designed the workflow. RRT,  
406 MAAKK and ABMMKI performed the analyses. RRT, MAAKK and ABMMKI wrote the  
407 manuscript. All authors read and approved the final manuscript.

## 408 **Acknowledgements**

409 Not applicable.

## 410 **References**

- 411 1. Johns Hopkins Coronavirus Resource Center. COVID-19 Map 2020 [cited 2020 07  
412 May]. Available from: <https://coronavirus.jhu.edu/map.html>.
- 413 2. Du Toit A. Outbreak of a novel coronavirus. *Nature Reviews Microbiology*.  
414 2020;18(3):123-.
- 415 3. Wu F, Zhao S, Yu B, Chen Y-M, Wang W, Song Z-G, et al. A new coronavirus  
416 associated with human respiratory disease in China. *Nature*. 2020;579(7798):265-9.
- 417 4. Zhong NS, Zheng BJ, Li YM, Poon, Xie ZH, Chan KH, et al. Epidemiology and  
418 cause of severe acute respiratory syndrome (SARS) in Guangdong, People's Republic of  
419 China, in February, 2003. *Lancet* (London, England). 2003;362(9393):1353-8.
- 420 5. Rothan HA, Byrareddy SN. The epidemiology and pathogenesis of coronavirus  
421 disease (COVID-19) outbreak. *Journal of Autoimmunity*. 2020;109:102433.
- 422 6. Kumar S, Nyodu R, Maurya VK, Saxena SK. Host Immune Response and  
423 Immunobiology of Human SARS-CoV-2 Infection. *Coronavirus Disease 2019 (COVID-19)*.  
424 2020:43-53.
- 425



7. Huang C, Wang Y, Li X, Ren L, Zhao J, Hu Y, et al. Clinical features of patients infected with 2019 novel coronavirus in Wuhan, China. *The Lancet*. 2020;395(10223):497-506.
8. Li H, Liu L, Zhang D, Xu J, Dai H, Tang N, et al. SARS-CoV-2 and viral sepsis: observations and hypotheses. *The Lancet*. 2020.
9. Zhou F, Yu T, Du R, Fan G, Liu Y, Liu Z, et al. Clinical course and risk factors for mortality of adult inpatients with COVID-19 in Wuhan, China: a retrospective cohort study. *The lancet*. 2020.
10. Tang N, Li D, Wang X, Sun Z. Abnormal coagulation parameters are associated with poor prognosis in patients with novel coronavirus pneumonia. *Journal of Thrombosis and Haemostasis*. 2020.
11. Sharma N, Singh SK. Implications of non-coding RNAs in viral infections. *Reviews in medical virology*. 2016;26(5):356-68.
12. Damas ND, Fossat N. Functional Interplay between RNA Viruses and Non-Coding RNA in Mammals. 2019;5(1).
13. Ma L, Bajic VB, Zhang Z. On the classification of long non-coding RNAs. *RNA Biol*. 2013;10(6):925-33.
14. Ernst C, Morton C. Identification and function of long non-coding RNA. *Frontiers in Cellular Neuroscience*. 2013;7(168).
15. Wang KC, Chang HY. Molecular mechanisms of long noncoding RNAs. *Molecular cell*. 2011;43(6):904-14.
16. Dhanoa JK, Sethi RS, Verma R, Arora JS, Mukhopadhyay CS. Long non-coding RNA: its evolutionary relics and biological implications in mammals: a review. *J Anim Sci Technol*. 2018;60:25-.
17. Salmena L, Poliseno L, Tay Y, Kats L, Pandolfi PP. A ceRNA hypothesis: the Rosetta Stone of a hidden RNA language? *Cell*. 2011;146(3):353-8.
18. Wang P. The Opening of Pandora's Box: An Emerging Role of Long Noncoding RNA in Viral Infections. *Frontiers in Immunology*. 2019;9(3138).
19. Liu W, Ding C. Roles of LncRNAs in Viral Infections. *Frontiers in Cellular and Infection Microbiology*. 2017;7(205).
20. Yi K, Zhang Y, Wang Y, Wang Z, Xie M, Jin Z, et al. Long noncoding RNA and its role in virus infection and pathogenesis. *Frontiers in bioscience (Landmark edition)* [Internet]. 2019 2019/03//; 24:[777-89 pp.]. Available from: <http://europepmc.org/abstract/MED/30844712>
21. Qiu L, Wang T, Tang Q, Li G, Wu P, Chen K. Long Non-coding RNAs: Regulators of Viral Infection and the Interferon Antiviral Response. *Frontiers in microbiology*. 2018;9:1621-.
22. Peng X, Gralinski L, Armour CD, Ferris MT, Thomas MJ, Proll S, et al. Unique Signatures of Long Noncoding RNA Expression in Response to Virus Infection and Altered Innate Immune Signaling. *mBio*. 2010;1(5):e00206-10.
23. Blanco-Melo D, Nilsson-Payant BE, Liu W-C, Uhl S, Hoagland D, Møller R, et al. Imbalanced host response to SARS-CoV-2 drives development of COVID-19. *Cell*. 2020.
24. Lu Z, Zhang QC, Lee B, Flynn RA, Smith MA, Robinson JT, et al. RNA Duplex Map in Living Cells Reveals Higher-Order Transcriptome Structure. *Cell*. 2016;165(5):1267-79.
25. Gordon DE, Jang GM, Bouhaddou M, Xu J, Obernier K, White KM, et al. A SARS-CoV-2 protein interaction map reveals targets for drug repurposing. *Nature*. 2020.
26. Tay Y, Rinn J, Pandolfi PP. The multilayered complexity of ceRNA crosstalk and competition. *Nature*. 2014;505(7483):344-52.



27. Qi X, Zhang DH, Wu N, Xiao JH, Wang X, Ma W. ceRNA in cancer: possible functions and clinical implications. *Journal of medical genetics*. 2015;52(10):710-8.
28. Su Q, Lv X. Revealing new landscape of cardiovascular disease through circular RNA-miRNA-mRNA axis. *Genomics*. 2020;112(2):1680-5.
29. Lang Y, Zhang J, Yuan Z. Construction and dissection of the ceRNA-ceRNA network reveals critical modules in depression. *Molecular medicine reports*. 2019;19(5):3411-20.
30. Zhang Y, Zhang H, An M, Zhao B, Ding H, Zhang Z, et al. Crosstalk in competing endogenous RNA networks reveals new circular RNAs involved in the pathogenesis of early HIV infection. *Journal of Translational Medicine*. 2018;16(1):332.
31. Das SS, Saha P, Chakravorty N. miRwayDB: a database for experimentally validated microRNA-pathway associations in pathophysiological conditions. *Database : the journal of biological databases and curation*. 2018;2018.
32. Girardi E, López P, Pfeffer S. On the Importance of Host MicroRNAs During Viral Infection. *Front Genet*. 2018;9:439-.
33. Leon-Icaza SA, Zeng M, Rosas-Taraco AG. microRNAs in viral acute respiratory infections: immune regulation, biomarkers, therapy, and vaccines. *ExRNA*. 2019;1(1):1.
34. Johnson DE, O'Keefe RA, Grandis JR. Targeting the IL-6/JAK/STAT3 signalling axis in cancer. *Nat Rev Clin Oncol*. 2018;15(4):234-48.
35. Velazquez-Salinas L, Verdugo-Rodriguez A, Rodriguez LL, Borca MV. The Role of Interleukin 6 During Viral Infections. *Frontiers in microbiology*. 2019;10:1057-.
36. Cheng P, Lu P, Guan J, Zhou Y, Zou L, Yi X, et al. LncRNA KCNQ1OT1 controls cell proliferation, differentiation and apoptosis by sponging miR-326 to regulate c-Myc expression in acute myeloid leukemia. *Neoplasma*. 2020;67(2):238-48.
37. Iliopoulos D, Hirsch HA, Struhl K. An Epigenetic Switch Involving NF- $\kappa$ B, Lin28, Let-7 MicroRNA, and IL6 Links Inflammation to Cell Transformation. *Cell*. 2009;139(4):693-706.
38. Pečina-Slaus N. Wnt signal transduction pathway and apoptosis: a review. *Cancer cell international*. 2010;10:22-.
39. Ljungberg JK, Kling JC, Tran TT, Blumenthal A. Functions of the WNT Signaling Network in Shaping Host Responses to Infection. *Frontiers in Immunology*. 2019;10(2521).
40. Ji WT, Liu HJ. PI3K-Akt signaling and viral infection. *Recent patents on biotechnology*. 2008;2(3):218-26.
41. Ma X, Shen D, Li H, Zhang Y, Lv X, Huang Q, et al. MicroRNA-185 inhibits cell proliferation and induces cell apoptosis by targeting VEGFA directly in von Hippel-Lindau-inactivated clear cell renal cell carcinoma. *Urologic Oncology: Seminars and Original Investigations*. 2015;33(4):169.e1-e11.
42. Liu T, Zhang L, Joo D, Sun S-C. NF- $\kappa$ B signaling in inflammation. *Signal Transduction and Targeted Therapy*. 2017;2(1):17023.
43. Freaney JE, Kim R, Mandhana R, Horvath CM. Extensive cooperation of immune master regulators IRF3 and NF $\kappa$ B in RNA Pol II recruitment and pause release in human innate antiviral transcription. *Cell reports*. 2013;4(5):959-73.
44. Rajsbaum R, García-Sastre A. Viral evasion mechanisms of early antiviral responses involving regulation of ubiquitin pathways. *Trends in microbiology*. 2013;21(8):421-9.
45. Lu WX. Long non-coding RNA MEG3 represses cholangiocarcinoma by regulating miR-361-5p/TRAF3 axis. *European review for medical and pharmacological sciences*. 2019;23(17):7356-68.
46. Chen K, Zhu H, Zheng MQ, Dong QR. LncRNA MEG3 Inhibits the Degradation of the Extracellular Matrix of Chondrocytes in Osteoarthritis via Targeting miR-93/TGFBR2 Axis. 2019:1947603519855759.

47. Kumar R, Khandelwal N, Thachamvally R, Tripathi BN, Barua S, Kashyap SK, et al. Role of MAPK/MNK1 signaling in virus replication. *Virus Res.* 2018;253:48-61.
48. Qiu L, Wang T, Tang Q, Li G, Wu P, Chen K. Long Non-coding RNAs: Regulators of Viral Infection and the Interferon Antiviral Response. *Frontiers in microbiology.* 2018;9:1621.
49. Kilchert C, Wittmann S, Vasiljeva L. The regulation and functions of the nuclear RNA exosome complex. *Nature Reviews Molecular Cell Biology.* 2016;17(4):227-39.
50. Olotu F, Omolabi K, Soliman M. Piece of the Puzzle: Remdesivir disassemble the multimeric SARS-CoV-2 RNA-dependent RNA Polymerase Non-Structural Proteins (RdRp-NSPs) complex. *Research Square*; 2020.
51. Yin W, Mao C, Luan X, Shen D-D, Shen Q, Su H, et al. Structural basis for inhibition of the RNA-dependent RNA polymerase from SARS-CoV-2 by remdesivir. *Science.* 2020:eabc1560.
52. Wada M, Lokugamage KG, Nakagawa K, Narayanan K, Makino S. Interplay between coronavirus, a cytoplasmic RNA virus, and nonsense-mediated mRNA decay pathway. *Proceedings of the National Academy of Sciences.* 2018;115(43):E10157-E66.
53. Mocquet V, Neusiedler J, Rende F, Cluet D, Robin J-P, Terme J-M, et al. The Human T-Lymphotropic Virus Type 1 Tax Protein Inhibits Nonsense-Mediated mRNA Decay by Interacting with INT6/EIF3E and UPF1. *Journal of virology.* 2012;86(14):7530-43.
54. Lamers MM, van den Hoogen BG, Haagmans BL. ADAR1: "Editor-in-Chief" of Cytoplasmic Innate Immunity. *Frontiers in Immunology.* 2019;10(1763).
55. Wang W, Xie Y, Chen F, Liu X, Zhong L-L, Wang H-Q, et al. LncRNA MEG3 acts a biomarker and regulates cell functions by targeting ADAR1 in colorectal cancer. *World journal of gastroenterology.* 2019;25(29):3972-84.
56. de Chassey B, Aublin-Gex A, Ruggieri A, Meyniel-Schicklin L, Pradezynski F, Davoust N, et al. The interactomes of influenza virus NS1 and NS2 proteins identify new host factors and provide insights for ADAR1 playing a supportive role in virus replication. *PLoS pathogens.* 2013;9(7).
57. Ke D, Li H, Zhang Y, An Y, Fu H, Fang X, et al. The combination of circulating long noncoding RNAs AK001058, INHBA-AS1, MIR4435-2HG, and CEBPA-AS1 fragments in plasma serve as diagnostic markers for gastric cancer. *Oncotarget.* 2017;8(13):21516-25.
58. Ma WQ, Chen J, Fang W, Yang XQ, Zhu A, Zhang D, et al. LncRNA INHBA-AS1 promotes cell growth, migration, and invasion of oral squamous cell carcinoma by sponging miR-143-3p. *European review for medical and pharmacological sciences.* 2020;24(4):1821-8.
59. Liu J, An P, Xue Y, Che D, Liu X, Zheng J, et al. Mechanism of Snhg8/miR-384/Hoxa13/FAM3A axis regulating neuronal apoptosis in ischemic mice model. *Cell Death & Disease.* 2019;10(6):441.
60. Li C, Miao R, Zhang J, Qu K, Liu C. Long non-coding RNA KCNQ1OT1 mediates the growth of hepatocellular carcinoma by functioning as a competing endogenous RNA of miR-504. *International journal of oncology.* 2018;52(5):1603-12.
61. Feng W, Wang C, Liang C, Yang H, Chen D, Yu X, et al. The dysregulated expression of KCNQ1OT1 and its interaction with downstream factors miR-145/CCNE2 in breast cancer cells. *Cellular Physiology and Biochemistry.* 2018;49(2):432-46.
62. Sun H, Li Y, Kong H, Dai S, Qian H. Dysregulation of KCNQ1OT1 promotes cholangiocarcinoma progression via miR-140-5p/SOX4 axis. *Archives of biochemistry and biophysics.* 2018;658:7-15.
63. Dong Z, Yang P, Qiu X, Liang S, Guan B, Yang H, et al. KCNQ1OT1 facilitates progression of non-small-cell lung carcinoma via modulating miRNA-27b-3p/HSP90AA1 axis. *Journal of cellular physiology.* 2019;234(7):11304-14.

64. Han L, Kong R, Yin DD, Zhang EB, Xu TP, De W, et al. Low expression of long noncoding RNA GAS6-AS1 predicts a poor prognosis in patients with NSCLC. *Medical oncology* (Northwood, London, England). 2013;30(4):694.
65. Li X, Zhang R, Liu Z, Li C, Xu H. Low expression of long noncoding RNA GAS6-AS1 as a novel biomarker of poor prognosis for breast cancer. *Int J Clin Exp Med*. 2016;9:15820-7.
66. Ge Y, Mansell A, Ussher JE, Brooks AES, Manning K, Wang CJH, et al. Rotavirus NSP4 Triggers Secretion of Proinflammatory Cytokines from Macrophages via Toll-Like Receptor 2. *Journal of virology*. 2013;87(20):11160-7.
67. Kurt-Jones EA, Popova L, Kwinn L, Haynes LM, Jones LP, Tripp RA, et al. Pattern recognition receptors TLR4 and CD14 mediate response to respiratory syncytial virus. *Nature immunology*. 2000;1(5):398-401.
68. Mogensen TH, Paludan SR. Reading the viral signature by Toll-like receptors and other pattern recognition receptors. *Journal of molecular medicine* (Berlin, Germany). 2005;83(3):180-92.
69. Bieback K, Lien E, Klagge IM, Avota E, Schneider-Schaulies J, Duprex WP, et al. Hemagglutinin protein of wild-type measles virus activates toll-like receptor 2 signaling. *Journal of virology*. 2002;76(17):8729-36.
70. Sun F, Yuan W, Wu H, Chen G, Sun Y, Yuan L, et al. LncRNA KCNQ1OT1 attenuates sepsis-induced myocardial injury via regulating miR-192-5p/XIAP axis. 2020;245(7):620-30.
71. Gattinoni L, Coppola S, Cressoni M, Busana M, Rossi S, Chiumello D. Covid-19 Does Not Lead to a "Typical" Acute Respiratory Distress Syndrome. *American journal of respiratory and critical care medicine*. 2020.
72. Bao Q, Liao X, Li R, Ding N. KCNQ1OT1 promotes migration and inhibits apoptosis by modulating miR-185-5p/Rab14 axis in oral squamous cell carcinoma. *Development, Growth & Differentiation*. 2019;61(9):466-74.
73. Chen DL, Shen DY, Han CK, Tian Y. LncRNA MEG3 aggravates palmitate-induced insulin resistance by regulating miR-185-5p/Egr2 axis in hepatic cells. *European review for medical and pharmacological sciences*. 2019;23(12):5456-67.
74. Wang Q, Li M, Shen Z, Bu F, Yu H, Pan X, et al. The Long Non-coding RNA MEG3/miR-let-7c-5p Axis Regulates Ethanol-Induced Hepatic Steatosis and Apoptosis by Targeting NLRC5. *Frontiers in Pharmacology*. 2018;9(302).
75. Barrett T, Wilhite SE, Ledoux P, Evangelista C, Kim IF, Tomashevsky M, et al. NCBI GEO: archive for functional genomics data sets—update. *Nucleic Acids Research*. 2012;41(D1):D991-D5.
76. Trapnell C, Pachter L, Salzberg SL. TopHat: discovering splice junctions with RNA-Seq. *Bioinformatics*. 2009;25(9):1105-11.
77. Lander ES, Linton LM, Birren B, Nusbaum C, Zody MC, Baldwin J, et al. Initial sequencing and analysis of the human genome. *Nature*. 2001;409(6822):860-921.
78. Hansen KD, Brenner SE, Dudoit S. Biases in Illumina transcriptome sequencing caused by random hexamer priming. *Nucleic Acids Res*. 2010;38(12):e131.
79. Hubbard TJP, Aken BL, Beal K, Ballester B, Cáccamo M, Chen Y, et al. Ensembl 2007. *Nucleic acids research*. 2007;35(suppl\_1):D610-D7.
80. Liao Y, Smyth GK, Shi W. The Subread aligner: fast, accurate and scalable read mapping by seed-and-vote. *Nucleic Acids Res*. 2013;41(10):e108.
81. Anders S, Huber W. Differential expression analysis for sequence count data. *Genome Biology*. 2010;11(10):R106-R.
82. Szklarczyk D, Gable AL, Lyon D, Junge A, Wyder S, Huerta-Cepas J, et al. STRING v11: protein-protein association networks with increased coverage, supporting functional

discovery in genome-wide experimental datasets. *Nucleic Acids Res.* 2019;47(D1):D607-d13.

83. Shannon P, Markiel A, Ozier O, Baliga NS, Wang JT, Ramage D, et al. Cytoscape: a software environment for integrated models of biomolecular interaction networks. *Genome research.* 2003;13(11):2498-504.

84. Teng X, Chen X, Xue H, Tang Y, Zhang P, Kang Q, et al. NPInter v4.0: an integrated database of ncRNA interactions. *Nucleic Acids Research.* 2019;48(D1):D160-D5.

85. Ma L, Cao J, Liu L, Du Q, Li Z, Zou D, et al. LncBook: a curated knowledgebase of human long non-coding RNAs. *Nucleic Acids Res.* 2019;47(D1):D128-d34.

86. Huang H-Y, Lin Y-C-D, Li J, Huang K-Y, Shrestha S, Hong H-C, et al. miRTarBase 2020: updates to the experimentally validated microRNA–target interaction database. *Nucleic Acids Research.* 2019;48(D1):D148-D54.

87. Karagkouni D, Paraskevopoulou MD, Tastsoglou S, Skoufos G, Karavangeli A, Pierros V, et al. DIANA-LncBase v3: indexing experimentally supported miRNA targets on non-coding transcripts. *Nucleic Acids Research.* 2019;48(D1):D101-D10.

88. Zhou G, Soufan O, Ewald J, Hancock REW, Basu N, Xia J. NetworkAnalyst 3.0: a visual analytics platform for comprehensive gene expression profiling and meta-analysis. *Nucleic Acids Research.* 2019;47(W1):W234-W41.

89. Samuel CE. Adenosine deaminase acting on RNA (ADAR1), a suppressor of double-stranded RNA–triggered innate immune responses. *Journal of Biological Chemistry.* 2019;294(5):1710-20.

90. Liddicoat BJ, Piskol R, Chalk AM, Ramaswami G, Higuchi M, Hartner JC, et al. RNA editing by ADAR1 prevents MDA5 sensing of endogenous dsRNA as nonself. *Science.* 2015;349(6252):1115-20.

91. Taylor DR, Puig M, Darnell ME, Mihalik K, Feinstone SM. New antiviral pathway that mediates hepatitis C virus replicon interferon sensitivity through ADAR1. *Journal of virology.* 2005;79(10):6291-8.

92. Li Z, Wolff KC, Samuel CE. RNA adenosine deaminase ADAR1 deficiency leads to increased activation of protein kinase PKR and reduced vesicular stomatitis virus growth following interferon treatment. *Virology.* 2010;396(2):316-22.

93. Toth AM, Li Z, Cattaneo R, Samuel CE. RNA-specific adenosine deaminase ADAR1 suppresses measles virus-induced apoptosis and activation of protein kinase PKR. *The Journal of biological chemistry.* 2009;284(43):29350-6.

94. Li Z, Okonski KM, Samuel CE. Adenosine deaminase acting on RNA 1 (ADAR1) suppresses the induction of interferon by measles virus. *Journal of virology.* 2012;86(7):3787-94.

95. Hartwig D, Schütte C, Warnecke J, Dorn I, Hennig H, Kirchner H, et al. The large form of ADAR 1 is responsible for enhanced hepatitis delta virus RNA editing in interferon-alpha-stimulated host cells. *Journal of viral hepatitis.* 2006;13(3):150-7.

96. Doria M, Neri F, Gallo A, Farace MG, Michienzi A. Editing of HIV-1 RNA by the double-stranded RNA deaminase ADAR1 stimulates viral infection. *Nucleic Acids Res.* 2009;37(17):5848-58.

97. Doria M, Tomaselli S, Neri F, Ciafrè SA, Farace MG, Michienzi A, et al. ADAR2 editing enzyme is a novel human immunodeficiency virus-1 proviral factor. *The Journal of general virology.* 2011;92(Pt 5):1228-32.

98. Rufanova VA, Alexanian A, Wakatsuki T, Lerner A, Sorokin A. Pyk2 mediates endothelin-1 signaling via p130Cas/BCAR3 cascade and regulates human glomerular mesangial cell adhesion and spreading. *J Cell Physiol.* 2009;219(1):45-56.

99. Chester AH, Yacoub MH. The role of endothelin-1 in pulmonary arterial hypertension. *Glob Cardiol Sci Pract.* 2014;2014(2):62-78.



100. Walsh HA, Botting NP. Purification and biochemical characterization of some of the properties of recombinant human kynureninase. *European journal of biochemistry*. 2002;269(8):2069-74.
101. Toma S, Nakamura M, Toné S, Okuno E, Kido R, Breton J, et al. Cloning and recombinant expression of rat and human kynureninase. *FEBS letters*. 1997;408(1):5-10.
102. de Marco MC, Kremer L, Albar JP, Martinez-Menarguez JA, Ballesta J, Garcia-Lopez MA, et al. BENE, a novel raft-associated protein of the MAL proteolipid family, interacts with caveolin-1 in human endothelial-like ECV304 cells. *The Journal of biological chemistry*. 2001;276(25):23009-17.
103. Saunier S, Calado J, Heilig R, Silbermann F, Benessy F, Morin G, et al. A novel gene that encodes a protein with a putative src homology 3 domain is a candidate gene for familial juvenile nephronophthisis. *Human molecular genetics*. 1997;6(13):2317-23.
104. Oliveira-Nascimento L, Massari P, Wetzler LM. The Role of TLR2 in Infection and Immunity. *Frontiers in immunology*. 2012;3:79-.
105. Lancioni CL, Li Q, Thomas JJ, Ding X, Thiel B, Drage MG, et al. Mycobacterium tuberculosis lipoproteins directly regulate human memory CD4(+) T cell activation via Toll-like receptors 1 and 2. *Infection and immunity*. 2011;79(2):663-73.
106. Drage MG, Pecora ND, Hise AG, Febbraio M, Silverstein RL, Golenbock DT, et al. TLR2 and its co-receptors determine responses of macrophages and dendritic cells to lipoproteins of Mycobacterium tuberculosis. *Cellular immunology*. 2009;258(1):29-37.
107. Brightbill HD, Libraty DH, Krutzik SR, Yang RB, Belisle JT, Bleharski JR, et al. Host defense mechanisms triggered by microbial lipoproteins through toll-like receptors. *Science*. 1999;285(5428):732-6.
108. Aliprantis AO, Yang RB, Mark MR, Suggett S, Devaux B, Radolf JD, et al. Cell activation and apoptosis by bacterial lipoproteins through toll-like receptor-2. *Science*. 1999;285(5428):736-9.
109. Stochlic L, Cartaud A, Mejat A, Grailhe R, Schaeffer L, Changeux J-P, et al. 14-3-3  $\gamma$  associates with muscle specific kinase and regulates synaptic gene transcription at vertebrate neuromuscular synapse. *Proceedings of the National Academy of Sciences*. 2004;101(52):18189-94.
110. Howlett KF, Sakamoto K, Garnham A, Cameron-Smith D, Hargreaves M. Resistance exercise and insulin regulate AS160 and interaction with 14-3-3 in human skeletal muscle. *Diabetes*. 2007;56(6):1608-14.
111. Autieri MV, Carbone CJ. 14-3-3Gamma interacts with and is phosphorylated by multiple protein kinase C isoforms in PDGF-stimulated human vascular smooth muscle cells. *DNA and cell biology*. 1999;18(7):555-64.
112. Yoshida K, Yamaguchi T, Natsume T, Kufe D, Miki Y. JNK phosphorylation of 14-3-3 proteins regulates nuclear targeting of c-Abl in the apoptotic response to DNA damage. *Nature cell biology*. 2005;7(3):278-85.
113. Subramanian RR, Masters SC, Zhang H, Fu H. Functional conservation of 14-3-3 isoforms in inhibiting bad-induced apoptosis. *Experimental cell research*. 2001;271(1):142-51.
114. Kakinuma N, Roy BC, Zhu Y, Wang Y, Kiyama R. Kank regulates RhoA-dependent formation of actin stress fibers and cell migration via 14-3-3 in PI3K-Akt signaling. *The Journal of cell biology*. 2008;181(3):537-49.
115. Yoo JO, Kwak SY, An HJ, Bae IH, Park MJ, Han YH. miR-181b-3p promotes epithelial-mesenchymal transition in breast cancer cells through Snail stabilization by directly targeting YWHAG. *Biochimica et biophysica acta*. 2016;1863(7 Pt A):1601-11.

116. Bai Q, Yu J, Li Y, Ma J, Gou Y. MicroRNA-182 promoted esophageal squamous cell carcinoma cell growth and metastasis via targeting YWHAG. *Journal of BUON : official journal of the Balkan Union of Oncology*. 2018;23(5):1439-47.
117. Westberg C, Yang JP, Tang H, Reddy TR, Wong-Staal F. A novel shuttle protein binds to RNA helicase A and activates the retroviral constitutive transport element. *The Journal of biological chemistry*. 2000;275(28):21396-401.
118. Yang JP, Tang H, Reddy TR, Wong-Staal F. Mapping the functional domains of HAP95, a protein that binds RNA helicase A and activates the constitutive transport element of type D retroviruses. *The Journal of biological chemistry*. 2001;276(33):30694-700.
119. Han I, Xue Y, Harada S, Orstavik S, Skalhegg B, Kieff E. Protein kinase A associates with HA95 and affects transcriptional coactivation by Epstein-Barr virus nuclear proteins. *Molecular and cellular biology*. 2002;22(7):2136-46.
120. Xing L, Zhao X, Guo F, Kleiman L. The role of A-kinase anchoring protein 95-like protein in annealing of tRNA<sup>Lys3</sup> to HIV-1 RNA. *Retrovirology*. 2014;11:58.
121. Mukherjee D, Gao M, O'Connor JP, Rajmakers R, Pruijn G, Lutz CS, et al. The mammalian exosome mediates the efficient degradation of mRNAs that contain AU-rich elements. *The EMBO journal*. 2002;21(1-2):165-74.
122. Baek SJ, Eling T. Growth differentiation factor 15 (GDF15): A survival protein with therapeutic potential in metabolic diseases. *Pharmacology & therapeutics*. 2019;198:46-58.
123. Adela R, Banerjee SK. GDF-15 as a Target and Biomarker for Diabetes and Cardiovascular Diseases: A Translational Prospective. *J Diabetes Res*. 2015;2015:490842-.
124. Tsai VW, Macia L, Johnen H, Kuffner T, Manadhar R, Jørgensen SB, et al. TGF- $\beta$  superfamily cytokine MIC-1/GDF15 is a physiological appetite and body weight regulator. *PLoS One*. 2013;8(2):e55174.
125. Mullican SE, Lin-Schmidt X, Chin CN, Chavez JA, Furman JL, Armstrong AA, et al. GFRAL is the receptor for GDF15 and the ligand promotes weight loss in mice and nonhuman primates. *Nature medicine*. 2017;23(10):1150-7.
126. Sarkar AA, Zohn IE. Hectd1 regulates intracellular localization and secretion of Hsp90 to control cellular behavior of the cranial mesenchyme. *The Journal of cell biology*. 2012;196(6):789-800.
127. Küspert M, Murakawa Y, Schäffler K, Vanselow JT, Wolf E, Juranek S, et al. LARP4B is an AU-rich sequence associated factor that promotes mRNA accumulation and translation. *RNA (New York, NY)*. 2015;21(7):1294-305.
128. Koso H, Yi H, Sheridan P, Miyano S, Ino Y, Todo T, et al. Identification of RNA-binding protein LARP4B as a tumor suppressor in glioma. *Cancer Research*. 2016;canres.2308.015.
129. Markert A, Grimm M, Martinez J, Wiesner J, Meyerhans A, Meyuhas O, et al. The La-related protein LARP7 is a component of the 7SK ribonucleoprotein and affects transcription of cellular and viral polymerase II genes. *EMBO reports*. 2008;9(6):569-75.
130. He N, Jahchan NS, Hong E, Li Q, Bayfield MA, Maraia RJ, et al. A La-related protein modulates 7SK snRNP integrity to suppress P-TEFb-dependent transcriptional elongation and tumorigenesis. *Mol Cell*. 2008;29(5):588-99.
131. Leong MML, Cheung AKL, Kwok TCT, Lung ML. Functional characterization of a candidate tumor suppressor gene, Mirror Image Polydactyly 1, in nasopharyngeal carcinoma. *International journal of cancer*. 2020;146(10):2891-900.
132. Lykke-Andersen J, Shu MD, Steitz JA. Human Upf proteins target an mRNA for nonsense-mediated decay when bound downstream of a termination codon. *Cell*. 2000;103(7):1121-31.

133. Chakrabarti S, Jayachandran U, Bonneau F, Fiorini F, Basquin C, Domcke S, et al. Molecular mechanisms for the RNA-dependent ATPase activity of Upf1 and its regulation by Upf2. *Mol Cell*. 2011;41(6):693-703.
134. Kashima I, Yamashita A, Izumi N, Kataoka N, Morishita R, Hoshino S, et al. Binding of a novel SMG-1-Upf1-eRF1-eRF3 complex (SURF) to the exon junction complex triggers Upf1 phosphorylation and nonsense-mediated mRNA decay. *Genes & development*. 2006;20(3):355-67.
135. Gregersen LH, Schueler M, Munschauer M, Mastrobuoni G, Chen W, Kempa S, et al. MOV10 Is a 5' to 3' RNA helicase contributing to UPF1 mRNA target degradation by translocation along 3' UTRs. *Mol Cell*. 2014;54(4):573-85.
136. Meister G, Landthaler M, Peters L, Chen PY, Urlaub H, Lührmann R, et al. Identification of novel argonaute-associated proteins. *Current biology : CB*. 2005;15(23):2149-55.
137. Liu C, Zhang X, Huang F, Yang B, Li J, Liu B, et al. APOBEC3G inhibits microRNA-mediated repression of translation by interfering with the interaction between Argonaute-2 and MOV10. *The Journal of biological chemistry*. 2012;287(35):29373-83.
138. Chendrimada TP, Finn KJ, Ji X, Baillat D, Gregory RI, Liebhaber SA, et al. MicroRNA silencing through RISC recruitment of eIF6. *Nature*. 2007;447(7146):823-8.
139. Balistreri G, Bognanni C, Mühlemann O. Virus Escape and Manipulation of Cellular Nonsense-Mediated mRNA Decay. *Viruses*. 2017;9(1):24.
140. Cuevas RA, Ghosh A, Wallerath C, Hornung V, Coyne CB, Sarkar SN. MOV10 Provides Antiviral Activity against RNA Viruses by Enhancing RIG-I-MAVS-Independent IFN Induction. *J Immunol*. 2016;196(9):3877-86.

## List of Tables

**Table 1:** DE genes, their encoded protein's functions and associated interacting lncRNAs.

| Gene Name   | Protein function                                                                                                                                                                                                                                                                                                                                                                                                               | lncRNA interactor                                                      | Interaction Type |
|-------------|--------------------------------------------------------------------------------------------------------------------------------------------------------------------------------------------------------------------------------------------------------------------------------------------------------------------------------------------------------------------------------------------------------------------------------|------------------------------------------------------------------------|------------------|
| <i>ADAR</i> | ADAR works as a regulator in RIG-I/MDA5 mediated induction of IFN-alpha/beta pathways and controls innate immune response against double-stranded RNA in the cell (89, 90). It exerts an antiviral effect on hepatitis C virus (HCV)(91), but works in favor of vesicular stomatitis virus (VSV)(92), measles virus (MV) (93, 94), hepatitis delta virus (HDV) (95), and human immunodeficiency virus type 1 (HIV-1) (96, 97). | <i>KCNQ1OT1</i><br><i>IGAS6-AS1</i><br><i>MEG3</i><br><i>INHBA-AS1</i> | Protein-RNA      |
| <i>EDN1</i> | Endothelin-1, which is an endothelium-derived vasoconstrictor peptide that belongs to the endothelin/sarafotoxin family (98). The peptide works as a potent vasoconstrictor and its cognate receptors are therapeutic targets in the treatment of pulmonary arterial hypertension (99). It is involved in downstream GPCR-controlled signaling.                                                                                | <i>UGDH-AS1</i>                                                        | RNA-RNA          |



|              |                                                                                                                                                                                                                                                                                                                                                                                                                                                                                                                                                                                                                                                                                                                                                                                                                                                                                                                                                      |                                                    |             |
|--------------|------------------------------------------------------------------------------------------------------------------------------------------------------------------------------------------------------------------------------------------------------------------------------------------------------------------------------------------------------------------------------------------------------------------------------------------------------------------------------------------------------------------------------------------------------------------------------------------------------------------------------------------------------------------------------------------------------------------------------------------------------------------------------------------------------------------------------------------------------------------------------------------------------------------------------------------------------|----------------------------------------------------|-------------|
| <i>KYNU</i>  | <i>KYNU</i> gene encodes Kynureninase enzyme, which catalyzes the cleavage of L-kynurenine and L-3-hydroxykynurenine into anthranilic acid and 3-hydroxyanthranilic acid respectively (100, 101). Among its functional pathways are NAD metabolism and tryptophan utilization.                                                                                                                                                                                                                                                                                                                                                                                                                                                                                                                                                                                                                                                                       | <i>FAM230J</i>                                     | RNA-RNA     |
| <i>MALL</i>  | <i>MALL</i> gene encodes an element of the machinery for raft-mediated trafficking in endothelial cells. The encoded protein, a member of the MAL proteolipid family, predominantly localizes in glycolipid- and cholesterol-enriched membrane (GEM) rafts. It interacts with caveolin-1 and is involved in cholesterol homeostasis (102, 103).                                                                                                                                                                                                                                                                                                                                                                                                                                                                                                                                                                                                      | <i>AC006058.1</i>                                  | RNA-RNA     |
| <i>TLR2</i>  | <i>TLR2</i> encodes the Toll-like receptor 2 protein, a fundamental protein in the pathways involved with pathogen recognition and activation of innate immunity (104). A cell-surface protein that can form heterodimers with other TLR family members, it can recognize conserved molecules derived from microorganisms known as pathogen-associated molecular patterns (PAMPs). Activation of TLRs by PAMPs switches on signaling pathways that modulate the host's inflammatory response (105, 106). <i>TLR2</i> acts via <i>MYD88</i> and <i>TRAF6</i> , leading to NF-kappa-B activation, cytokine secretion and inflammatory response. This gene may also promote apoptosis in response to bacterial lipoproteins (107, 108).                                                                                                                                                                                                                 | <i>KCNQ1OT1</i>                                    | RNA-RNA     |
| <i>YWHAG</i> | <i>YWHAG</i> encodes the 14-3-3 protein gamma, an adapter protein implicated in the regulation of a large spectrum of both general and specialized signaling pathways. It is induced by growth factors in human vascular smooth muscle cells, and is also highly expressed in skeletal and heart muscles, suggesting an important role for this protein in muscle tissue (109, 110). Among its interactors are RAF1 and protein kinase C, which link it to various signal transduction pathways (111). The protein is involved in apoptosis and PI3K-Akt signaling pathway (112-114). <i>YWHAG</i> was identified as a direct target of miR-181b-3p, a metastasis activator which downregulated <i>YWHAG</i> to promote Snail-induced epithelial-mesenchymal transformation (EMT) in breast cancer cells (115). MiR-182 was found to suppress esophageal squamous cell carcinoma cell proliferation and metastasis via regulating <i>YWHAG</i> (116) | <i>KCNQ1OT1</i><br><i>SNHG8</i><br><i>GAS6-AS1</i> | Protein-RNA |

796

797 **Table 2:** SARS-CoV-2 interactor host proteins and associated interacting lncRNAs.

| Gene Name     | Protein function                                                                                                                                                                                                                                                                                                                                                                                                                                                                                                                                                                                                                     | SARS Interactor Protein | lncRNA interactor                                                                            | Interaction Type |
|---------------|--------------------------------------------------------------------------------------------------------------------------------------------------------------------------------------------------------------------------------------------------------------------------------------------------------------------------------------------------------------------------------------------------------------------------------------------------------------------------------------------------------------------------------------------------------------------------------------------------------------------------------------|-------------------------|----------------------------------------------------------------------------------------------|------------------|
| <i>AKAP8L</i> | AKAP8L (A-kinase anchor protein 8-like) protein probably plays a role in constitutive transport element (CTE)-mediated gene expression by association with DHX9 by increasing nuclear unspliced mRNA export (117, 118). In EBV infected cells, it may target PRKACA to EBNA-LP-containing nuclear sites to modulate transcription from specific promoters (119). In synergy with DHX9, it can activate the CTE-mediated gene expression of type D retroviruses (118). In case of HIV-1 infection, it is involved in the DHX9-promoted annealing of host tRNA (Lys3) to viral genomic RNA as a primer in reverse transcription (120). | M                       | <i>KCNQ1OT1</i><br><i>GAS6-AS1</i><br><i>SNHG8</i><br><i>AC048341.2</i><br><i>AL109615.3</i> | Protein-RNA      |
| <i>EXOSC5</i> | EXOSC5 is a non-catalytic component of the RNA exosome complex which has 3' to 5' exoribonuclease activity and participates in a multitude of cellular RNA processing and degradation events (121).                                                                                                                                                                                                                                                                                                                                                                                                                                  | Nsp8                    | <i>KCNQ1OT1</i><br><i>SNHG8</i>                                                              | Protein-RNA      |
| <i>GDF15</i>  | <i>GDF15</i> is a member of the Glial cell-derived neurotrophic factor (GDNF) family which binds to GDNF family receptor $\alpha$ -like (GFRAL) protein, a transmembrane receptor exclusively expressed in the hind brain (122). The protein is expressed in a broad range of cell types, acts as a pleiotropic cytokine and is involved in the stress response program of cells after cellular injury (123). Increased protein levels are associated with disease states such as tissue hypoxia, inflammation, acute injury and oxidative stress (124, 125).                                                                        | ORF8                    | <i>MEG3</i>                                                                                  | RNA-RNA          |
| <i>HECTD1</i> | HECTD1 is an E3 ubiquitin-protein ligase which accepts ubiquitin from an E2 ubiquitin-conjugating enzyme in the form of a thioester and then directly transfers the ubiquitin to targeted substrates and mediates 'Lys-63'-linked polyubiquitination of HSP90AA1 which leads to its intracellular localization and reduced secretion (126). The protein is involved in class I MHC mediated antigen processing and presentation and innate immune system.                                                                                                                                                                            | Nsp8                    | <i>KCNQ1OT1</i>                                                                              | RNA-RNA          |

|               |                                                                                                                                                                                                                                                                                                                                                                                                                                                                                                          |       |                                                                                                                                                                                                                                                                             |             |
|---------------|----------------------------------------------------------------------------------------------------------------------------------------------------------------------------------------------------------------------------------------------------------------------------------------------------------------------------------------------------------------------------------------------------------------------------------------------------------------------------------------------------------|-------|-----------------------------------------------------------------------------------------------------------------------------------------------------------------------------------------------------------------------------------------------------------------------------|-------------|
| <i>LARP4B</i> | <i>LARP4B</i> encodes a La-module containing factor that can bind AU-rich RNA sequence directly and promotes mRNA accumulation and translation (127). It was deemed a candidate tumor suppressor gene in glioma, as it was consistently decreased in human glioma stem cells and cell lines compared with normal neural stem cells. <i>LARP4B</i> overexpression strongly inhibited cell proliferation by inducing mitotic arrest and apoptosis and <i>CDKN1A</i> and <i>BAX</i> were upregulated (128). | Nsp12 | <i>UGDH-AS1</i><br><i>SNHG8</i>                                                                                                                                                                                                                                             | Protein-RNA |
| <i>LARP7</i>  | <i>LARP7</i> works as a negative transcriptional regulator of polymerase II genes, acting by means of the 7SK RNP system (129). This snRNP complex inhibits a cyclin-dependent kinase, positive transcription elongation factor b, which is required for paused RNA polymerase II at a promoter to begin transcription elongation (130).                                                                                                                                                                 | Nsp8  | <i>KCNQ1OT1</i><br><i>SNHG8</i>                                                                                                                                                                                                                                             | Protein-RNA |
| <i>MIPOL1</i> | <i>MIPOL1</i> encodes a coiled-coil domain-containing protein, which may function as a tumor suppressor (131).                                                                                                                                                                                                                                                                                                                                                                                           | Nsp13 | <i>KCNQ1OT1</i>                                                                                                                                                                                                                                                             | RNA-RNA     |
| <i>UPF1</i>   | UPF1 protein, an RNA-dependent helicase and ATPase, is required for nonsense-mediated decay (NMD) of mRNAs containing premature stop codons (132, 133). It is recruited to mRNAs upon translation termination by release factors to stalled ribosomes together with the SMG1C protein kinase complex to form the transient SURF (SMG1-UPF1-eRF1-eRF3) complex (134).                                                                                                                                     | N     | <i>AC048341.2</i><br><i>LINC00937</i><br><i>GAS6-AS1</i><br><i>KCNQ1OT1</i><br><i>UGDH-AS1</i><br><i>SNHG8</i><br><i>AC087473.1</i><br><i>AL109615.3</i><br><i>INHBA-AS1</i><br><i>MEG3</i><br><i>LINC02015</i><br><i>MIR3142HG</i><br><i>AC006058.1</i><br><i>C1RL-AS1</i> | Protein-RNA |

|                |                                                                                                                                                                                                                                                                                                                                                                                                                                                                     |       |                                                                                                                                                                                                                                     |             |
|----------------|---------------------------------------------------------------------------------------------------------------------------------------------------------------------------------------------------------------------------------------------------------------------------------------------------------------------------------------------------------------------------------------------------------------------------------------------------------------------|-------|-------------------------------------------------------------------------------------------------------------------------------------------------------------------------------------------------------------------------------------|-------------|
| <i>MOV10</i>   | MOV10 is a 5' to 3' RNA helicase contributing to UPF1 mRNA target degradation by translocation along 3' UTRs (135) and is involved in miRNA-mediated gene silencing by the RNA-induced silencing complex (RISC) (136). It plays a role for both miRNA-mediated translational repression and miRNA-mediated cleavage of complementary mRNAs by RISC (137, 138). UPF1-MOV10 is involved in antiviral activity through both NMD pathway (139) and IFN induction (140). | N     | <i>LINC00504</i><br><i>AC048341.2</i><br><i>LINC00937</i><br><i>GAS6-AS1</i><br><i>KCNQ1OT1</i><br><i>UGDH-AS1</i><br><i>SNHG8</i><br><i>AC087473.1</i><br><i>AL109615.3</i><br><i>INHBA-AS1</i><br><i>MEG3</i><br><i>LINC02015</i> | Protein-RNA |
| <i>PRKAR2A</i> | PRKAR2A is the cAMP-dependent protein kinase type II-alpha regulatory subunit, which works as the regulatory subunit of the cAMP-dependent protein kinases involved in cAMP signaling in cells (131).                                                                                                                                                                                                                                                               | Nsp13 | <i>KCNQ1OT1</i>                                                                                                                                                                                                                     | RNA-RNA     |

798

## 799 Figure legends

800 **Figure 1:** Differentially expressed lncRNAs in SARS-CoV-2 infection. Gene expressions are  
801 presented in Log2 fold change (compared to uninfected control cells) value color coded  
802 heatmap. Color towards red indicates more upregulation and color towards green indicates  
803 further downregulation, while yellow color indicates absence of differential expression.

804 **Figure 2:** Differentially expressed lncRNAs that interact with differentially expressed  
805 protein-coding Genes. Node shape legends: ellipse: DE gene, hexagon: lncRNA, diamond:  
806 viral protein, Octagon: viral protein interactor, rectangle: microRNA; types of edges are- dot-  
807 dash: VP-host protein interaction; dash: lncRNA-gene interaction, dash-arrow: miRNA-gene  
808 interaction; solid: protein-protein interaction; sine wave: ceRNA; separate arrows: alternate  
809 target. Log2 Fold change color scale is as depicted in Figure 1.

810 **Figure 3:** Differentially expressed lncRNAs that interact with SARS-CoV-2 protein  
811 interacting genes. Color codes, node and edge notations are similar as Figure 2.

812 **Figure 4:** Potential virally induced microRNAs and their targets. Color depth of the node  
813 conveys level of expression. Color codes, node and edge notations are similar as Figure 2.

814

815     **List of supplementary files**

816     **Supplementary file 1:** List of differentially expressed genes in SARS-CoV-2 infected cells.

817

818     **Supplementary file 2:** List of Human proteins and their associated interacting SARS-CoV-2

819     proteins.

820     **Supplementary file 3:** DE Genes targeted by virally induced microRNAs.

|            |                                              |
|------------|----------------------------------------------|
| MIR3142HG  | MIR3142 host gene                            |
| AC048341.2 | Novel transcript                             |
| LINC02015  | Long intergenic non-protein coding RNA 2015  |
| INHBA-AS1  | INHBA antisense RNA 1                        |
| AC008760.2 | Novel transcript, sense intronic C3          |
| AL109615.3 | Novel transcript, antisense to C6orf223      |
| C1RL-AS1   | C1RL antisense RNA 1                         |
| AC006058.1 | Novel transcript                             |
| MEG3       | Maternally expressed 3                       |
| SNHG8      | Small nucleolar RNA host gene 8              |
| UGDH-AS1   | UGDH antisense RNA 1                         |
| AC007743.1 | Novel transcript, antisense to CCDC85A       |
| KCNQ1OT1   | KCNQ1 opposite strand/antisense transcript 1 |
| LINC00504  | Long intergenic non-protein coding RNA 504   |
| AC087473.1 | Novel transcript                             |
| GAS6-AS1   | GAS6 antisense RNA 1                         |
| AP000542.3 | Novel transcript                             |
| AL603839.3 | Novel transcript                             |
| FAM230J    | Family with sequence similarity 230 member J |
| LINC00937  | Long intergenic non-protein coding RNA 937   |
| FAM106A    | Family with sequence similarity 106 member A |

Log<sub>2</sub> Fold Change Scale

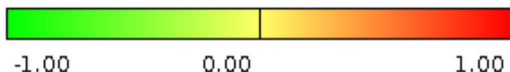

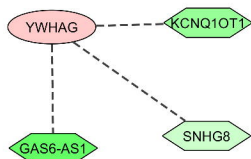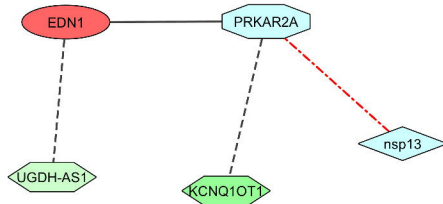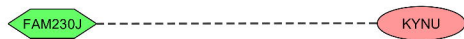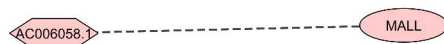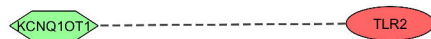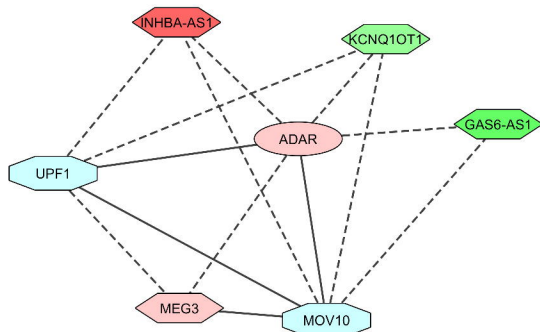

### Legends:

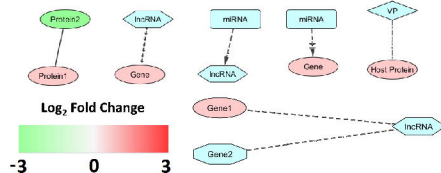



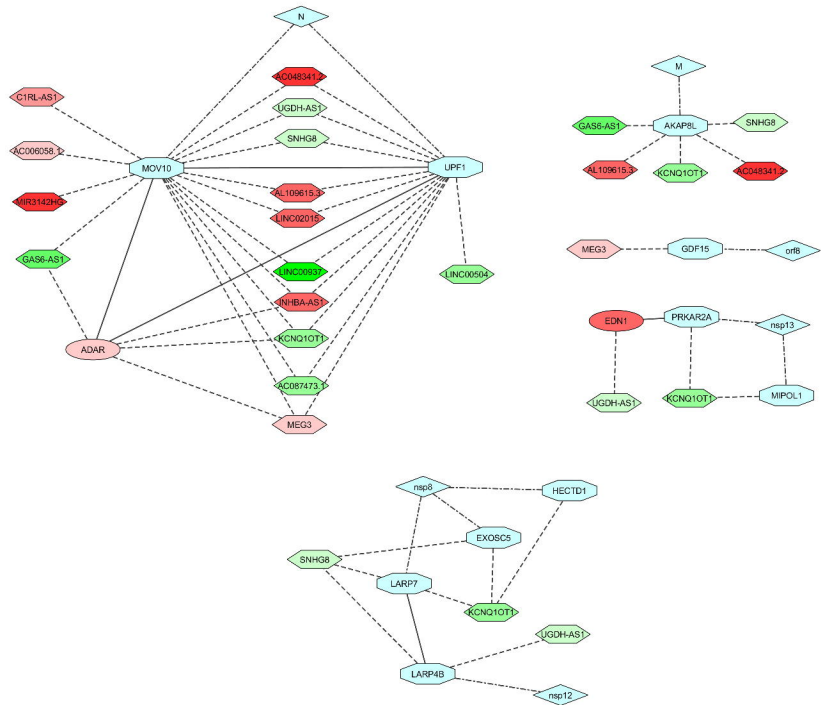

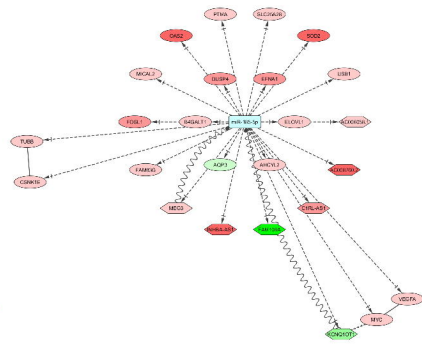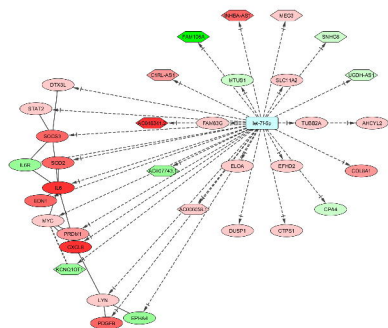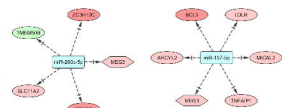

Source: https://www.biorxiv.org/content/10.1101/2020.06.29.177204v1.full.pdf
